# Supplementary material for: Excited-state spectroscopic investigations of multinuclear complexes based on [Ru(bpy)3]2+ moieties connected to 2,2′-bipyridine and 2,2′;6′,2′′-terpyridine ligands
Source: Royal Society of Chemistry journal article supplement (doi:10.1039/c3dt52153b), 2013-01-01
Supplement: c3dt52153b.pdf [file c3dt52153b.pdf]

# Excited-state spectroscopic investigations of multinuclear complexes based on $[\text{Ru}(\text{bpy})_3]^{2+}$ moieties connected to 2,2'-bipyridine and 2,2';6',2''-terpyridine ligands

Raphael Horvath, Jean Lombard, Jean-Claude Leprêtre, Marie-Noëlle Collomb, Alain Deronzier, Jérôme Chauvin\* and Keith C. Gordon\*

†MacDiarmid Institute for Advanced Materials and Nanotechnology, Department of Chemistry, University of Otago, Dunedin, New Zealand

‡Département de Chimie Moléculaire, UMR-5250, ICMG FR-2607, CNRS Université Joseph Fourier, BP-53, 38041, Grenoble cedex 9, France

**KEYWORDS** (*Word Style "BG\_Keywords"*). If you are submitting your paper to a journal that requires keywords, provide significant keywords to aid the reader in literature retrieval.

## SUPPLEMENTARY INFORMATION

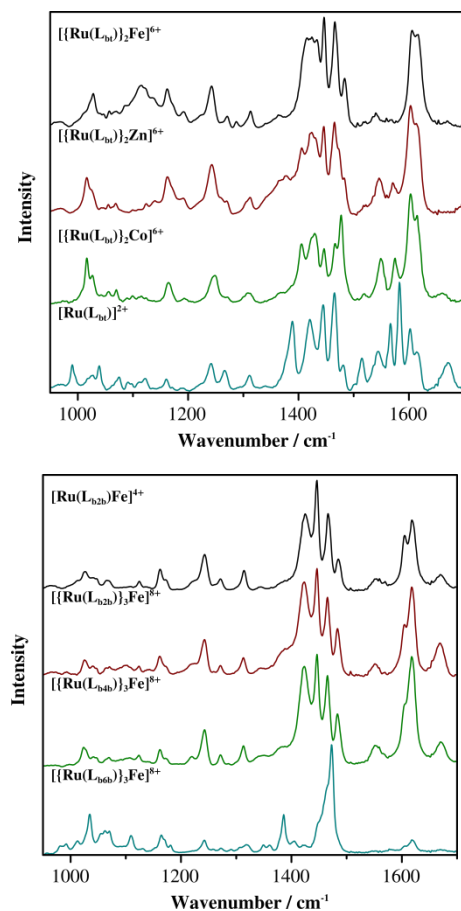

Figure S1. FT-IR spectra of the L<sub>bt</sub> containing complexes (top) and the L<sub>bnb</sub> containing complexes (bottom), acquired in KBr.

**Table S1. MAD values and scale factors for the calculated spectra.**

|                                                        | Raman<br>cm <sup>-1</sup> | IR | Scale Factor |
|--------------------------------------------------------|---------------------------|----|--------------|
| [{Ru(L <sub>bt</sub> ) <sub>2</sub> Fe] <sup>6+</sup>  | 5                         | 4  | 0.9736       |
| [{Ru(L <sub>bt</sub> ) <sub>2</sub> Zn] <sup>6+</sup>  | 9                         | 5  | 0.9758       |
| [{Ru(L <sub>bt</sub> ) <sub>2</sub> Co] <sup>6+</sup>  |                           |    |              |
| [Ru(L <sub>bt</sub> ) <sup>2+</sup>                    | 11                        | 7  | 0.9709       |
| [Ru(L <sub>b2b</sub> )Fe] <sup>4+</sup>                | 4                         | 6  | 0.9736       |
| [{Ru(L <sub>b2b</sub> ) <sub>3</sub> Fe] <sup>8+</sup> |                           |    |              |

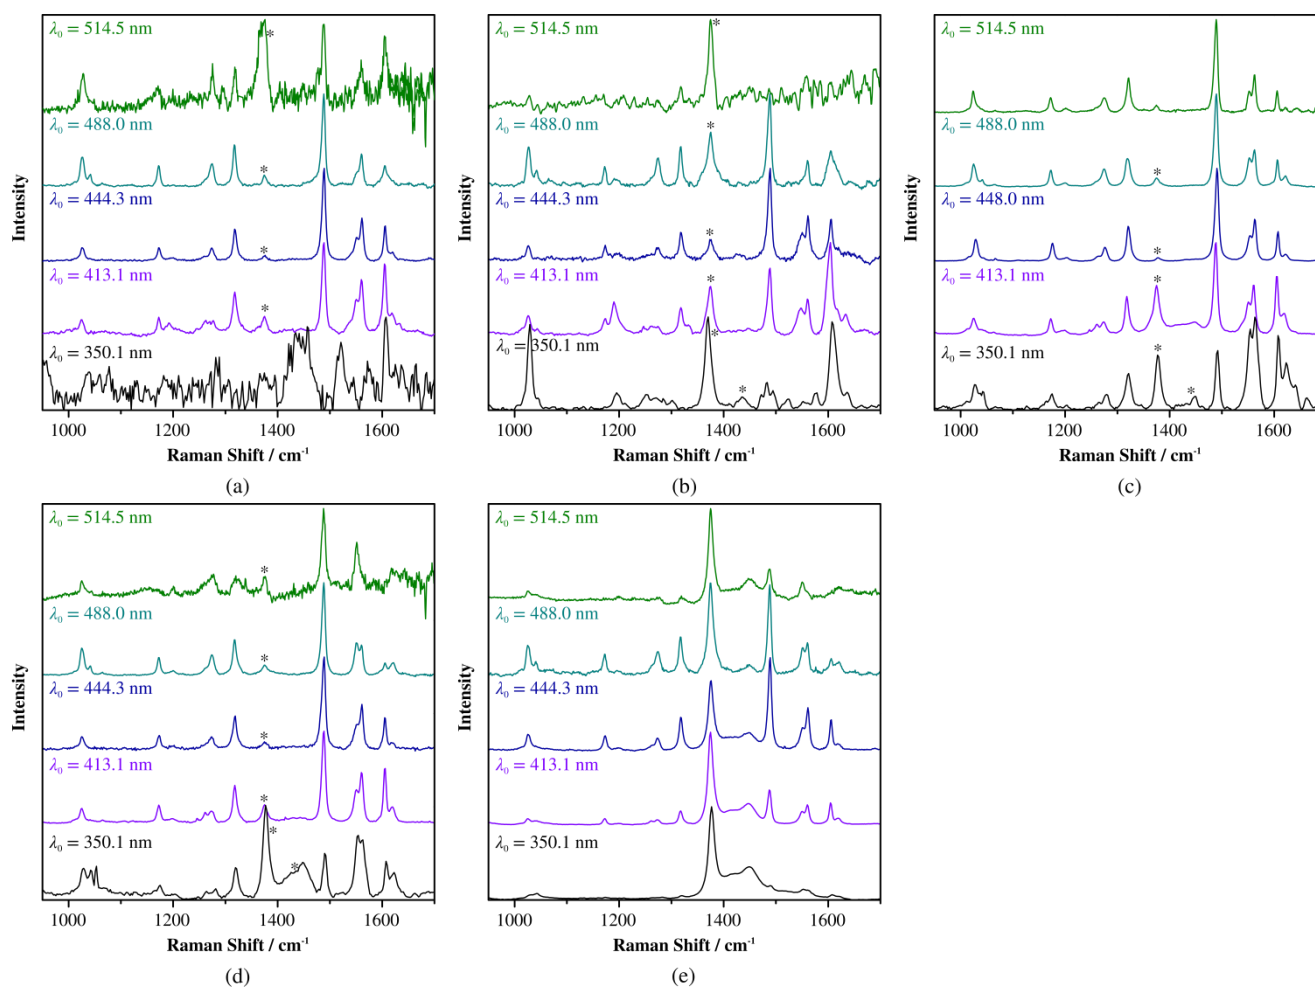

Figure S2. Resonance Raman spectra of (a) [Ru(L<sub>bt</sub>)<sup>2+</sup>, (b) [{Ru(L<sub>bt</sub>)<sub>2</sub>Zn]<sup>6+</sup>, (c) [Ru(L<sub>b2b</sub>)Fe]<sup>4+</sup>, (d) [{Ru(L<sub>b4b</sub>)<sub>3</sub>Fe]<sup>8+</sup>, (e) [{Ru(L<sub>b6b</sub>)<sub>3</sub>Fe]<sup>8+</sup>. All spectra were acquired in CH<sub>3</sub>CN. Solvent peaks are marked with asterisks.

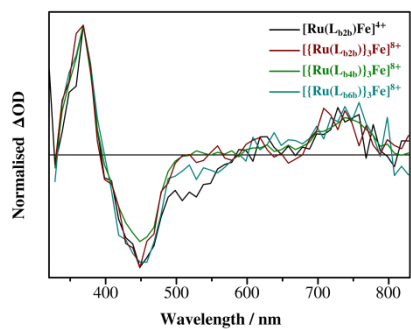

Figure S3. Transient absorption spectra of the  $\text{L}_{\text{hnb}}$ -based complexes, integrated over the first 10 ns.
